# Supplementary material for: Two-dimensional π-conjugated metal bis(dithiolene) nanosheets as promising electrocatalysts for carbon dioxide reduction: a computational study
Source: Royal Society of Chemistry journal article supplement (doi:10.1039/c9ta02271f), 2019-01-01
Supplement: c9ta02271f1.pdf [file c9ta02271f1.pdf]

## Supporting Information

### **Two-Dimensional $\pi$ -Conjugated Metal Bis(Dithiolene) Nanosheets as Promising Electrocatalysts for Carbon Dioxide Reduction: A Computational Study**

Yu Tian,<sup>a</sup> Changyan Zhu,<sup>a</sup> Likai Yan,<sup>a\*</sup> Jingxiang Zhao,<sup>b\*</sup> and Zhongmin Su<sup>a</sup>

<sup>a</sup> Institute of Functional Materials Chemistry and National & Local United Engineering Lab for Power Battery, Faculty of Chemistry, Northeast Normal University, Changchun, 130024, China.

<sup>b</sup> College of Chemistry and Chemical Engineering, Harbin Normal University, Harbin, 150025, China.

\* To whom correspondence should be addressed. *E*-mail: yanlk924@nenu.edu.cn (L. K.); xjz\_hmily@163.com (J. -X. Zhao).

**Table S1.** The geometric parameters, charge (Q)<sup>a</sup> of per M atom, magnetic moment of per M atom ( $M_M$ )<sup>a</sup> and total moment of  $M_3C_{12}S_{12}$  ( $M_{tot}$ )<sup>a</sup>.

|                    | lattice constant<br>(Å) | M–S distance<br>(Å) | Q (e) | $M_M(\mu_B)$ | $M_{tot}(\mu_B)$ | $E_{coh}/eV$ |
|--------------------|-------------------------|---------------------|-------|--------------|------------------|--------------|
| $Fe_3C_{12}S_{12}$ | 14.80                   | 2.19                | 0.70  | 2.16         | 5.86             | –5.25        |
| $Co_3C_{12}S_{12}$ | 14.76                   | 2.17                | 0.58  | 0.98         | 2.90             | –5.19        |
| $Ni_3C_{12}S_{12}$ | 14.62                   | 2.15                | 0.51  | 0.00         | 0.00             | –5.24        |
| $Ru_3C_{12}S_{12}$ | 15.19                   | 2.29                | 0.55  | 1.49         | 4.84             | –5.31        |
| $Rh_3C_{12}S_{12}$ | 15.07                   | 2.27                | 0.36  | 0.26         | 1.03             | –5.28        |
| $Pd_3C_{12}S_{12}$ | 15.05                   | 2.30                | 0.30  | 0.00         | 0.00             | –5.07        |

<sup>a</sup>The Bader charge and magnetic momentum are calculated by VASP program.

**Table S2.** The computed free energies ( $\Delta G$ ) of CO<sub>2</sub>RR species on Ru<sub>3</sub>C<sub>12</sub>S<sub>12</sub> and Rh<sub>3</sub>C<sub>12</sub>S<sub>12</sub> sheets.

|                                                 | Elementary Step                                                                        | $\Delta G/\text{eV}$ |
|-------------------------------------------------|----------------------------------------------------------------------------------------|----------------------|
| Ru <sub>3</sub> C <sub>12</sub> S <sub>12</sub> | $\text{CO}^* \rightarrow \text{CO} + *$                                                | 1.78                 |
| Ru <sub>3</sub> C <sub>12</sub> S <sub>12</sub> | $\text{CO}^* + \text{H}^+ + \text{e}^- \rightarrow \text{CHO}^*$                       | 1.08                 |
| Rh <sub>3</sub> C <sub>12</sub> S <sub>12</sub> | $\text{CO}^* \rightarrow \text{CO} + *$                                                | 0.99                 |
| Rh <sub>3</sub> C <sub>12</sub> S <sub>12</sub> | $\text{CO}^* + \text{H}^+ + \text{e}^- \rightarrow \text{CHO}^*$                       | 0.43                 |
| Rh <sub>3</sub> C <sub>12</sub> S <sub>12</sub> | $\text{CO}^* + \text{H}^+ + \text{e}^- \rightarrow \text{COH}^*$                       | 1.82                 |
| Rh <sub>3</sub> C <sub>12</sub> S <sub>12</sub> | $\text{CHOH}^* + \text{H}^+ + \text{e}^- \rightarrow \text{CH}^* + \text{H}_2\text{O}$ | 0.88                 |
| Rh <sub>3</sub> C <sub>12</sub> S <sub>12</sub> | $\text{CHO}^* + \text{H}^+ + \text{e}^- \rightarrow \text{H}_2\text{CO}^*$             | 0.64                 |

**Table S3.** Chemical process and transition state imaginary vibrational frequency for each elementary step on Rh<sub>3</sub>C<sub>12</sub>S<sub>12</sub>.

| Elementary Step                                                      | Chemical process                                  | TS <i>Vib.</i> (cm <sup>-1</sup> ) |
|----------------------------------------------------------------------|---------------------------------------------------|------------------------------------|
| CO <sub>2</sub> + H* → COOH*                                         | O–H bond formation                                | <i>i</i> 894.18                    |
| COOH* + H* → CO* + H <sub>2</sub> O                                  | C–OH bond dissociation<br>with O–H bond formation | <i>i</i> 1150.65                   |
| CO* + H* → CHO*                                                      | C–H bond formation                                | <i>i</i> 1687.28                   |
| CHO* + H* → CHOH*                                                    | O–H bond formation                                | <i>i</i> 1381.83                   |
| CHO* + H* → H <sub>2</sub> CO*                                       | C–H bond formation                                | <i>i</i> 273.15                    |
| CHOH* + H* → CH <sub>2</sub> OH*                                     | C–H bond formation                                | <i>i</i> 1568.20                   |
| H <sub>2</sub> CO* + H* → OCH <sub>3</sub> *                         | C–H bond formation                                | <i>i</i> 1418.47                   |
| CH <sub>2</sub> OH* + H* → CH <sub>2</sub> *(bri) + H <sub>2</sub> O | C–OH bond dissociation<br>with O–H bond formation | <i>i</i> 355.33                    |
| CH <sub>2</sub> *(bri) + H* → CH <sub>2</sub> *(top)                 | C–S bond dissociation                             | <i>i</i> 216.88                    |
| OCH <sub>3</sub> * + H* → CH <sub>3</sub> OH*                        | C–H bond formation                                | <i>i</i> 1352.04                   |
| CH <sub>2</sub> * + H* → CH <sub>3</sub> *                           | C–H bond formation                                | <i>i</i> 1312.34                   |
| CH <sub>3</sub> * + H* → CH <sub>4</sub> + *                         | C–H bond formation                                | <i>i</i> 1039.79                   |

**Table S4.** Chemical process and transition state imaginary vibrational frequency of water-assisted CHO\* formation on Rh<sub>3</sub>C<sub>12</sub>S<sub>12</sub>.

| Elementary Step | Model          | Chemical process   | TS <i>Vib.</i> (cm <sup>-1</sup> ) |
|-----------------|----------------|--------------------|------------------------------------|
| CO* + H* → CHO* | H-shuttling    | C-H bond formation | <i>i</i> 773.03                    |
| CO* + H* → CHO* | water-solvated | C-H bond formation | <i>i</i> 1678.86                   |

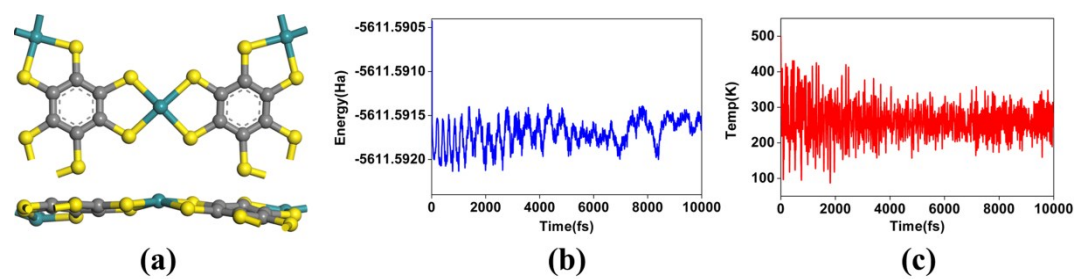

**Figure S1.** (a) Geometry snapshot, variation of (b) total energy and (c) temperature of  $\text{Ru}_3\text{C}_{12}\text{S}_{12}$  at 10 ps during MD simulation at 500 K.

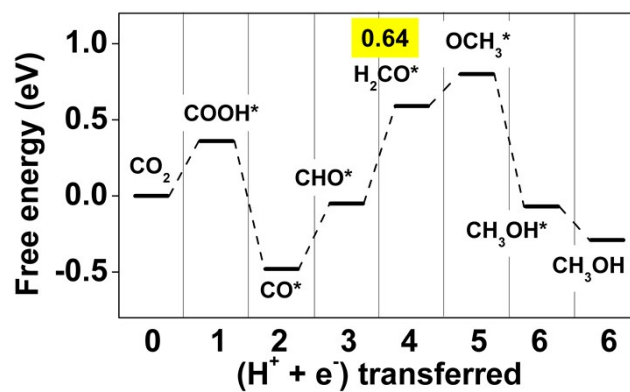

**Figure S2** Free energy profiles for reduction CO<sub>2</sub> to CH<sub>3</sub>OH formation on Rh<sub>3</sub>C<sub>12</sub>S<sub>12</sub>.

The pathway is shown at the indicated potential of 0 V vs RHE. The free energy zero is set as that of the catalyst and the isolated CO<sub>2</sub> molecule. The maximum  $\Delta G$  of the whole pathway is highlighted in yellow.

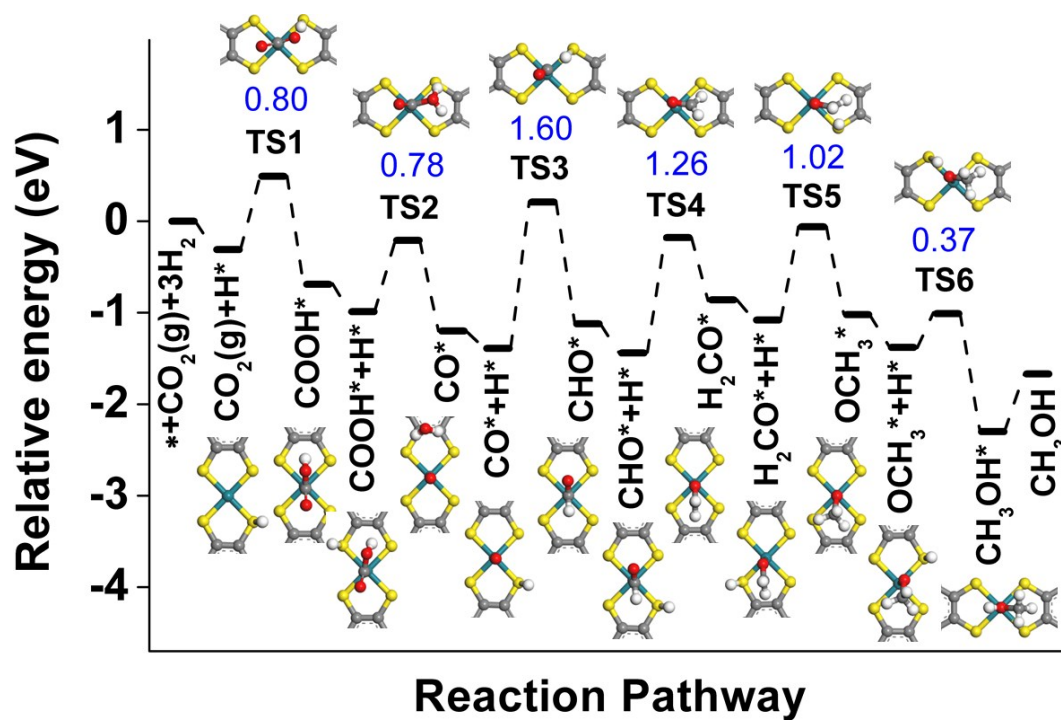

**Figure S3** Potential energy profiles for reduction  $\text{CO}_2$  to  $\text{CH}_3\text{OH}$  on  $\text{Rh}_3\text{C}_{12}\text{S}_{12}$ . The total energy of the catalyst, isolated  $\text{CO}_2$ , and three  $\text{H}_2$  are taken as zero for reference.

Color code: Rh, green; S, yellow; C, gray; O, red; H, white.



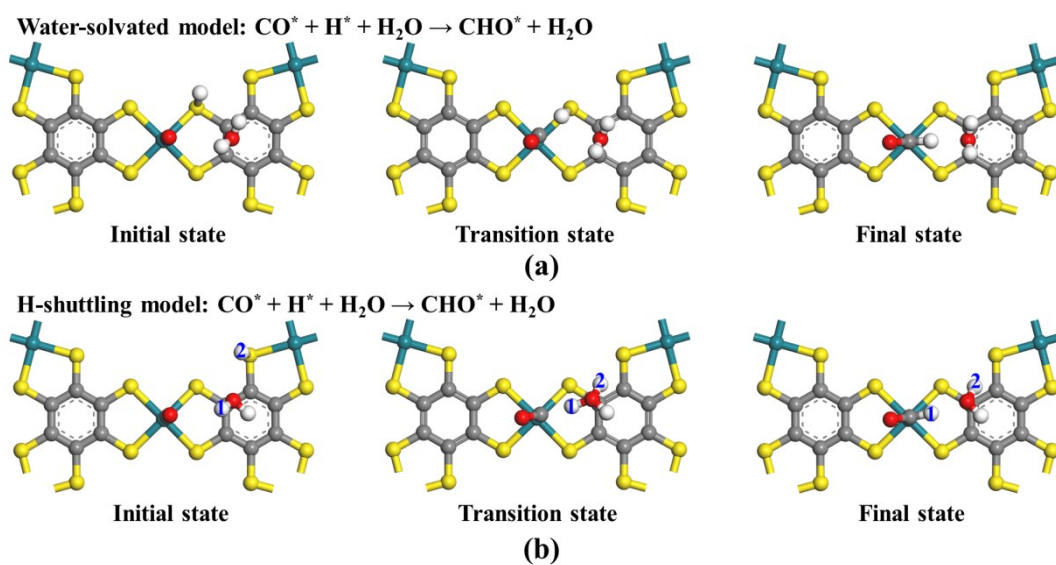

**Figure S4** The structures of the initial, transition, and final states for reduction  $\text{CO}^*$  to  $\text{CHO}^*$  on  $\text{Rh}_3\text{C}_{12}\text{S}_{12}$  with 1  $\text{H}_2\text{O}$  in the (a) water-solvated, and (b) H-shuttling models.

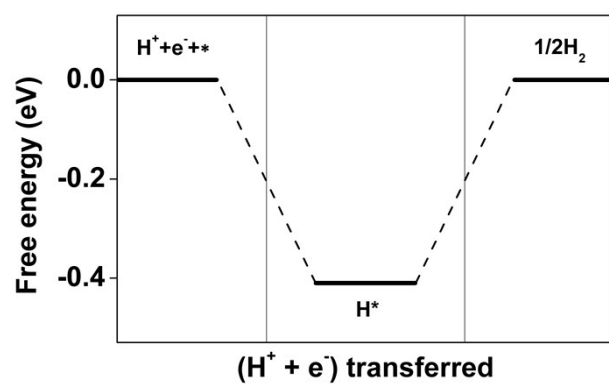

**Figure S5.** The energy diagram of the HER on  $\text{Rh}_3\text{C}_{12}\text{S}_{12}$ .
